# Supplementary material for: EAT-UpTF: Enrichment Analysis Tool for Upstream Transcription Factors of a Group of Plant Genes
Source: Front Genet. 2020 Sep 11;11:566569. doi: 10.3389/fgene.2020.566569 (PMC7516213; doi:10.3389/fgene.2020.566569)
Supplement: Supplementary file 3 [file Table_3.XLSX]

## Sheet: Sheet1
Supplementary Table 3. Summary statistics of enriched upstream transcription factors for down-regulated genes in cca1lhy double mutant (Kamioka et al. 2016).
TF ID (AGI ID)	xa	nb	Observed (%)	Xc	Nd	Expected (%)	p-value	Corrected p-valuee	Gene symbol	Gene name
AT2G46270	100	289	0.346021	5255	27206	0.193156	5.85863e-10	7.99984e-08	GBF3	G-box binding factor 3
AT5G15830	115	289	0.397924	6440	27206	0.236712	6.87665e-10	7.99984e-08	AtbZIP3, bZIP3	basic leucine-zipper 3
AT4G34590	128	289	0.442907	7781	27206	0.286003	8.42969e-09	7.35491e-07	AtbZIP11, ATB2, BZIP11, GBF6	NA, Arabidopsis thaliana basic leucine-zipper 11, G-box binding factor 6
AT2G36270	81	289	0.280277	4188	27206	0.153937	2.68104e-08	1.87137e-06	ABI5, AtABI5, GIA1	GROWTH-INSENSITIVITY TO ABA 1, ABA INSENSITIVE 5, NA
AT2G35530	43	289	0.148789	1630	27206	0.0599133	3.43637e-08	1.99882e-06	bZIP16, AtbZIP16	NA, basic region/leucine zipper transcription factor 16
AT1G32150	114	289	0.394464	6979	27206	0.256524	1.66959e-07	8.32411e-06	bZIP68, AtbZIP68	NA, basic region/leucine zipper transcription factor 68
AT2G18160	49	289	0.16955	2268	27206	0.083364	1.43919e-06	6.27848e-05	GBF5, ATBZIP2, bZIP2, FTM3	basic leucine-zipper 2, G-BOX BINDING FACTOR 5, FLORAL TRANSITION AT THE MERISTEM3
AT3G56850	72	289	0.249135	3936	27206	0.144674	1.78199e-06	6.91017e-05	AREB3, DPBF3	NA, ABA-responsive element binding protein 3
AT1G45249	45	289	0.155709	2112	27206	0.0776299	5.93674e-06	0.000207192	AREB1, ABF2, ATAREB1, AtABF2	NA, ABSCISIC ACID RESPONSIVE ELEMENTS-BINDING PROTEIN 2, abscisic acid responsive elements-binding factor 2
AT1G75390	50	289	0.17301	2485	27206	0.0913401	8.1685e-06	0.000259164	AtbZIP44, bZIP44	basic leucine-zipper 44
AT4G36780	78	289	0.269896	4944	27206	0.181725	0.000129481	0.00376574	BEH2	BES1/BZR1 homolog 2
AT1G79180	44	289	0.152249	2353	27206	0.0864883	0.000167452	0.00449546	ATMYB63, MYB63	MYB DOMAIN PROTEIN 63, myb domain protein 63
AT5G45300	36	289	0.124567	1951	27206	0.0717121	0.00087681	0.0218576	BAM8, BMY2	beta-amylase 2, BETA-AMYLASE 8
AT1G78700	67	289	0.231834	4366	27206	0.160479	0.000965325	0.0224599	BEH4	BES1/BZR1 homolog 4
AT1G09540	44	289	0.152249	2746	27206	0.100934	0.00380981	0.0797641	ATMYB61, MYB61	myb domain protein 61, ARABIDOPSIS THALIANA MYB DOMAIN PROTEIN 61
AT1G69010	130	289	0.449827	10132	27206	0.372418	0.00403055	0.0797641	BIM2	BES1-interacting Myc-like protein 2
AT3G10800	27	289	0.0934256	1469	27206	0.0539954	0.00411391	0.0797641	BZIP28	NA
AT3G30210	32	289	0.110727	1853	27206	0.06811	0.00467982	0.085961	ATMYB121, MYB121	NA, myb domain protein 121
AT1G59640	28	289	0.0968858	1651	27206	0.0606851	0.010065	0.173524	ZCW32, BPEub, BPEp, BPE	NA, BIG PETAL UB, BIG PETAL P, BIG PETAL
AT5G19790	36	289	0.124567	2273	27206	0.0835477	0.0104413	0.173524	RAP2.11	related to AP2 11
AT4G04890	32	289	0.110727	1978	27206	0.0727046	0.0116834	0.185341	PDF2	protodermal factor 2
AT5G10030	51	289	0.176471	3516	27206	0.129236	0.0125911	0.191057	TGA4, OBF4	TGACG motif-binding factor 4, OCS ELEMENT BINDING FACTOR 4
AT1G06180	37	289	0.128028	2422	27206	0.0890245	0.0160169	0.231119	ATMYB13, MYB13, ATMYBLFGN	myb domain protein 13, NA
AT4G26030	108	289	0.373702	8528	27206	0.31346	0.0165558	0.231119
AT5G25810	25	289	0.0865052	1602	27206	0.0588841	0.0355373	0.47702	tny	TINY
AT2G02450	67	289	0.231834	5156	27206	0.189517	0.0408546	0.528084	ANAC035, LOV1, ANAC034, AtLOV1, NAC035	NA, LONG VEGETATIVE PHASE 1, Arabidopsis NAC domain containing protein 34, NAC domain containing protein 35
AT3G20310	126	289	0.435986	10522	27206	0.386753	0.0484483	0.603874	ERF7, ATERF7, ATERF-7	NA, ethylene response factor 7
AT1G08320	50	289	0.17301	3761	27206	0.138242	0.0541163	0.647757	bZIP21, TGA9	NA, TGACG (TGA) motif-binding protein 9
AT2G04038	13	289	0.0449827	744	27206	0.0273469	0.0556811	0.647757	AtbZIP48, bZIP48	basic leucine-zipper 48
AT4G25490	68	289	0.235294	5372	27206	0.197456	0.0627913	0.668493	CBF1, DREB1B, ATCBF1	DRE BINDING PROTEIN 1B, C-repeat/DRE binding factor 1, NA
AT5G08130	11	289	0.0380623	615	27206	0.0226053	0.0654073	0.668493	BIM1	NA
AT5G65210	48	289	0.16609	3646	27206	0.134015	0.0670108	0.668493	TGA1	TGACG sequence-specific binding protein 1
AT3G24520	54	289	0.186851	4167	27206	0.153165	0.0674397	0.668493	AT-HSFC1, HSFC1	NA, heat shock transcription factor C1
AT1G03800	54	289	0.186851	4168	27206	0.153201	0.0676741	0.668493	ERF10, ATERF10	ERF domain protein 10, ARABIDOPSIS THALIANA RF DOMAIN PROTEIN 10
AT5G09410	32	289	0.110727	2295	27206	0.0843564	0.0689563	0.668493	CAMTA1, EICBP.B	calmodulin-binding transcription activator 1, ethylene induced calmodulin binding protein
AT5G06839	11	289	0.0380623	628	27206	0.0230831	0.0733784	0.692137	TGA10, bZIP65	NA, TGACG (TGA) motif-binding protein 10
AT5G23930	57	289	0.197232	4466	27206	0.164155	0.0764485	0.695076
AT5G51990	100	289	0.346021	8325	27206	0.305999	0.0788804	0.695076	CBF4, DREB1D	DEHYDRATION-RESPONSIVE ELEMENT-BINDING PROTEIN 1D, C-repeat-binding factor 4
AT5G54230	66	289	0.228374	5272	27206	0.193781	0.0796649	0.695076	AtMYB49, MYB49	myb domain protein 49
AT3G12250	120	289	0.415225	10187	27206	0.374439	0.0845449	0.719663	TGA6, BZIP45	TGACG motif-binding factor 6, NA
AT5G56110	82	289	0.283737	6759	27206	0.248438	0.0934189	0.776267	MYB103, AtMYB103, ATMYB80, MYB80, MS188	ARABIDOPSIS THALIANA MYB DOMAIN PROTEIN 80, NA, MALE STERILE 188, myb domain protein 103
AT5G58850	61	289	0.211073	4895	27206	0.179924	0.0970105	0.787365	ATMYB119, MYB119	myb domain protein 119, MYB DOMAIN PROTEIN 119
AT1G77920	43	289	0.148789	3324	27206	0.122179	0.099345	0.787987	TGA7	TGACG sequence-specific binding protein 7
AT5G06960	31	289	0.107266	2308	27206	0.0848342	0.104681	0.811044	TGA5, OBF5	TGACG MOTIF-BINDING FACTOR 5, OCS-element binding factor 5
AT2G40620	46	289	0.15917	3610	27206	0.132691	0.108066	0.811044
AT1G28370	69	289	0.238754	5657	27206	0.207932	0.11142	0.811044	ATERF11, ERF11	ERF domain protein 11, ERF DOMAIN PROTEIN 11
AT4G25480	51	289	0.176471	4064	27206	0.149379	0.113488	0.811044	DREB1A, CBF3, ATCBF3	dehydration response element B1A, NA, C-REPEAT BINDING FACTOR 3
AT1G43160	30	289	0.103806	2248	27206	0.0826288	0.115751	0.811044	RAP2.6	related to AP2 6
AT1G68550	58	289	0.200692	4691	27206	0.172425	0.116195	0.811044	CRF10	cytokinin response factor 10
AT4G32800	41	289	0.141869	3207	27206	0.117878	0.120517	0.824713
AT5G52020	73	289	0.252595	6069	27206	0.223076	0.127667	0.836771
AT4G31060	34	289	0.117647	2623	27206	0.0964126	0.130541	0.836771
AT2G33710	52	289	0.179931	4208	27206	0.154672	0.133804	0.836771
AT3G50260	146	289	0.50519	12825	27206	0.471403	0.136233	0.836771	ATERF#011, CEJ1, DEAR1	cooperatively regulated by ethylene and jasmonate 1, NA, DREB AND EAR MOTIF PROTEIN 1
AT1G16490	48	289	0.16609	3861	27206	0.141917	0.136553	0.836771	ATMYB58, MYB58	myb domain protein 58, MYB DOMAIN PROTEIN 58
AT5G39610	32	289	0.110727	2466	27206	0.0906418	0.13809	0.836771	ATNAC2, ATNAC6, ORE1, ANAC092, NAC2, NAC6	Arabidopsis NAC domain containing protein 92, NAC domain containing protein 2, NAC domain containing protein 6, ORESARA 1
AT2G36010	18	289	0.0622837	1290	27206	0.047416	0.14577	0.836771	ATE2FA, E2F3	NA, E2F transcription factor 3
AT4G25470	38	289	0.131488	3004	27206	0.110417	0.146148	0.836771	ATCBF2, FTQ4, DREB1C, CBF2	C-repeat/DRE binding factor 2, FREEZING TOLERANCE QTL 4, NA, DRE/CRT-BINDING PROTEIN 1C
AT3G17730	48	289	0.16609	3891	27206	0.14302	0.148983	0.836771	anac057, NAC057	NAC domain containing protein 57
AT5G06950	28	289	0.0968858	2144	27206	0.0788061	0.150015	0.836771	TGA2, AHBP-1B	NA, TGACG sequence-specific binding protein 2
AT1G12630	71	289	0.245675	5960	27206	0.219069	0.152107	0.836771
AT2G03340	17	289	0.0588235	1216	27206	0.044696	0.152426	0.836771	WRKY3	WRKY DNA-binding protein 3
AT5G64060	55	289	0.190311	4535	27206	0.166691	0.157654	0.836771	anac103, NAC103	NAC domain containing protein 103
AT5G67300	126	289	0.435986	11038	27206	0.405719	0.160275	0.836771	MYBR1, MYB44, ATMYBR1, ATMYB44	ARABIDOPSIS THALIANA MYB DOMAIN PROTEIN 44, NA, myb domain protein r1
AT3G12720	154	289	0.532872	13671	27206	0.502499	0.163777	0.836771	ATY53, MYB67, ATMYB67	NA, myb domain protein 67
AT1G77200	56	289	0.193772	4646	27206	0.170771	0.166639	0.836771
AT2G31220	13	289	0.0449827	913	27206	0.0335588	0.176136	0.836771
AT3G15210	57	289	0.197232	4758	27206	0.174888	0.176179	0.836771	ERF4, ATERF4, RAP2.5, ATERF-4	ETHYLENE RESPONSIVE ELEMENT BINDING FACTOR 4, RELATED TO AP2 5, ethylene responsive element binding factor 4
AT3G09735	77	289	0.266436	6577	27206	0.241748	0.1792	0.836771
AT1G02230	65	289	0.224913	5487	27206	0.201683	0.179243	0.836771	ANAC004, NAC004	NAC domain containing protein 4
AT2G45420	54	289	0.186851	4503	27206	0.165515	0.182696	0.836771	LBD18	LOB domain-containing protein 18
AT1G34190	40	289	0.138408	3255	27206	0.119643	0.183536	0.836771	anac017, NAC017	NAC domain containing protein 17
AT2G23290	97	289	0.33564	8427	27206	0.309748	0.185471	0.836771	MYB70, AtMYB70	myb domain protein 70
AT1G69490	49	289	0.16955	4061	27206	0.149269	0.185664	0.836771	ATNAP, NAP, ANAC029	NAC-LIKE, ACTIVATED BY AP3/PI, Arabidopsis NAC domain containing protein 29, NAC-like, activated by AP3/PI
AT2G31230	86	289	0.297578	7422	27206	0.272807	0.187731	0.836771	ERF15, ATERF15	ethylene-responsive element binding factor 15
AT5G08330	32	289	0.110727	2557	27206	0.0939866	0.187866	0.836771	AtTCP11, TCP11	NA, TCP domain protein 11
AT5G46830	82	289	0.283737	7057	27206	0.259391	0.188274	0.836771	NIG1, ATNIG1	NACL-INDUCIBLE GENE 1, NACL-inducible gene 1
AT4G11660	13	289	0.0449827	927	27206	0.0340734	0.189653	0.836771	HSFB2B, HSF7, AT-HSFB2B	NA, HEAT SHOCK TRANSCRIPTION FACTOR B2B
AT1G72010	26	289	0.0899654	2039	27206	0.0749467	0.19181	0.836771
AT5G62020	15	289	0.0519031	1103	27206	0.0405425	0.197796	0.852234	AT-HSFB2A, HSFB2A	ARABIDOPSIS THALIANA HEAT SHOCK TRANSCRIPTION FACTOR B2A, heat shock transcription factor B2A
AT4G37260	83	289	0.287197	7185	27206	0.264096	0.202773	0.863023	MYB73, ATMYB73	NA, myb domain protein 73
AT3G15500	74	289	0.256055	6370	27206	0.23414	0.206451	0.865116	ANAC055, NAC055, NAC3, ATNAC3	NAC domain containing protein 3, NAC domain containing protein 55
AT5G04410	86	289	0.297578	7474	27206	0.274719	0.208296	0.865116	NAC2, anac078	NAC domain containing protein 2, Arabidopsis NAC domain containing protein 78
AT4G01550	51	289	0.176471	4298	27206	0.15798	0.214055	0.865116	NAC069, NTM2, ANAC069	NAC domain containing protein 69, NAC with Transmembrane Motif 2
AT1G53910	63	289	0.217993	5399	27206	0.198449	0.220805	0.865116	RAP2.12	related to AP2 12
AT1G80840	71	289	0.245675	6131	27206	0.225355	0.221908	0.865116	WRKY40, ATWRKY40	WRKY DNA-binding protein 40, NA
AT4G18770	54	289	0.186851	4587	27206	0.168603	0.223191	0.865116	AtMYB98, MYB98	myb domain protein 98
AT5G18270	26	289	0.0899654	2085	27206	0.0766375	0.223903	0.865116	ANAC087	Arabidopsis NAC domain containing protein 87
AT3G49530	46	289	0.15917	3880	27206	0.142616	0.231494	0.865116	ANAC062, NTL6, NAC062	NTM1 (NAC WITH TRANSMEMBRANE MOTIF 1)-LIKE 6, NAC domain containing protein 62
AT2G01060	96	289	0.33218	8458	27206	0.310887	0.233906	0.865116
AT4G18880	10	289	0.0346021	717	27206	0.0263545	0.233997	0.865116	AT-HSFA4A, HSF A4A	heat shock transcription factor A4A, ARABIDOPSIS THALIANA HEAT SHOCK TRANSCRIPTION FACTOR A4A
AT1G19210	68	289	0.235294	5884	27206	0.216276	0.234505	0.865116
AT4G10350	94	289	0.32526	8275	27206	0.304161	0.234706	0.865116	ANAC070, NAC070, BRN2	BEARSKIN 2, NAC domain containing protein 70
AT1G71450	108	289	0.373702	9574	27206	0.351908	0.23549	0.865116
AT3G10480	84	289	0.290657	7367	27206	0.270786	0.241094	0.866325	NAC050, ANAC050	NAC domain containing protein 50
AT1G24250	26	289	0.0899654	2109	27206	0.0775197	0.241598	0.866325
AT1G54330	71	289	0.245675	6180	27206	0.227156	0.244645	0.866325	ANAC020, NAC020	NAC domain containing protein 20
AT1G12610	27	289	0.0934256	2205	27206	0.0810483	0.247205	0.866325	DDF1	DWARF AND DELAYED FLOWERING 1
AT2G18060	66	289	0.228374	5730	27206	0.210615	0.248477	0.866325	VND1, ANAC037	Arabidopsis NAC domain containing protein 37, vascular related NAC-domain protein 1
AT2G35700	51	289	0.176471	4367	27206	0.160516	0.250713	0.866325	ERF38, ATERF38	ERF family protein 38, ERF FAMILY PROTEIN 38
AT1G52880	51	289	0.176471	4383	27206	0.161104	0.259616	0.888295	ATNAM, NARS2, ANAC018, NAM	NA, NO APICAL MERISTEM, NAC-REGULATED SEED MORPHOLOGY 2, Arabidopsis NAC domain containing protein 18
AT3G15170	33	289	0.114187	2763	27206	0.101558	0.263575	0.893085	ATNAC1, CUC1, ANAC054	NA, CUP-SHAPED COTYLEDON1, Arabidopsis NAC domain containing protein 54
AT4G34410	46	289	0.15917	3945	27206	0.145005	0.268993	0.900856	RRTF1	redox responsive transcription factor 1
AT5G08520	48	289	0.16609	4133	27206	0.151915	0.272715	0.900856
AT5G16820	76	289	0.262976	6706	27206	0.24649	0.276742	0.900856	HSFA1B, ATHSFA1B, ATHSF3, HSF3	CLASS A HEAT SHOCK FACTOR 1B, heat shock factor 3, ARABIDOPSIS THALIANA CLASS A HEAT SHOCK FACTOR 1B, ARABIDOPSIS HEAT SHOCK FACTOR 3
AT5G22990	50	289	0.17301	4337	27206	0.159413	0.285564	0.900856
AT1G22070	36	289	0.124567	3067	27206	0.112732	0.286872	0.900856	TGA3	TGA1A-related gene 3
AT4G16150	9	289	0.0311419	673	27206	0.0247372	0.288474	0.900856
AT3G11280	22	289	0.0761246	1813	27206	0.0666397	0.289316	0.900856
AT2G30590	17	289	0.0588235	1370	27206	0.0503565	0.289409	0.900856	WRKY21	WRKY DNA-binding protein 21
AT1G06850	54	289	0.186851	4715	27206	0.173307	0.292797	0.900856	bZIP52, AtbZIP52	basic leucine-zipper 52
AT5G29000	47	289	0.16263	4077	27206	0.149857	0.293807	0.900856	PHL1	PHR1-like 1
AT1G32870	53	289	0.183391	4626	27206	0.170036	0.294262	0.900856	NAC13, ANAC13, ANAC013	NAC domain protein 13, Arabidopsis NAC domain containing protein 13
AT1G53230	16	289	0.0553633	1293	27206	0.0475263	0.300975	0.911926	TCP3	TEOSINTE BRANCHED 1, cycloidea and PCF transcription factor 3
AT2G02080	104	289	0.359862	9357	27206	0.343931	0.303104	0.911926	IDD4, AtIDD4	indeterminate(ID)-domain 4
AT5G25190	49	289	0.16955	4281	27206	0.157355	0.306835	0.915259	ESE3	ethylene and salt inducible 3
AT4G06746	25	289	0.0865052	2105	27206	0.0773726	0.309578	0.915616	RAP2.9, DEAR5	related to AP2 9, DREB AND EAR MOTIF PROTEIN 5
AT5G64750	26	289	0.0899654	2201	27206	0.0809013	0.314579	0.917812	ABR1	ABA REPRESSOR1
AT4G16750	121	289	0.418685	10971	27206	0.403257	0.31558	0.917812
AT5G67190	34	289	0.117647	2932	27206	0.10777	0.319766	0.922301	DEAR2	DREB and EAR motif protein 2
AT4G18890	10	289	0.0346021	787	27206	0.0289274	0.327236	0.936109	BEH3	BES1/BZR1 homolog 3
AT1G06280	128	289	0.442907	11660	27206	0.428582	0.331009	0.939206	LBD2	LOB domain-containing protein 2
AT1G28160	12	289	0.0415225	970	27206	0.0356539	0.336303	0.946529
AT1G30210	35	289	0.121107	3053	27206	0.112218	0.341761	0.954197	TCP24, ATTCP24	TEOSINTE BRANCHED 1, cycloidea, and PCF family 24, NA
AT1G74650	149	289	0.515571	13683	27206	0.502941	0.354793	0.98272	ATY13, ATMYB31, MYB31	myb domain protein 31, NA, ARABIDOPSIS THALIANA MYB DOMAIN PROTEIN 31
AT2G38470	50	289	0.17301	4471	27206	0.164339	0.368542	0.999983	ATWRKY33, WRKY33	WRKY DNA-BINDING PROTEIN 33, WRKY DNA-binding protein 33
AT2G02820	75	289	0.259516	6794	27206	0.249724	0.37137	0.999983	MYB88, AtMYB88	myb domain protein 88
AT3G06490	22	289	0.0761246	1909	27206	0.0701683	0.377324	0.999983	MYB108, BOS1, AtMYB108	myb domain protein 108, BOTRYTIS-SUSCEPTIBLE1
AT1G02250	71	289	0.245675	6448	27206	0.237007	0.385995	0.999983	anac005, NAC005	NAC domain containing protein 5
AT4G24020	10	289	0.0346021	829	27206	0.0304712	0.386504	0.999983	NLP7	NIN like protein 7
AT3G53200	33	289	0.114187	2929	27206	0.10766	0.387017	0.999983	MYB27, AtMYB27	myb domain protein 27
AT1G69690	11	289	0.0380623	921	27206	0.0338528	0.389238	0.999983	AtTCP15, TCP15	NA, TEOSINTE BRANCHED1/CYCLOIDEA/PCF 15
AT4G36160	96	289	0.33218	8794	27206	0.323238	0.393477	0.999983	VND2, ANAC076, NAC076	NAC domain containing protein 76, VASCULAR-RELATED NAC-DOMAIN 2
AT5G62470	13	289	0.0449827	1107	27206	0.0406896	0.395757	0.999983	ATMYB96, MYBCOV1, MYB96	NA, MYB DOMAIN PROTEIN 96, myb domain protein 96
AT2G40740	79	289	0.273356	7217	27206	0.265272	0.399149	0.999983	WRKY55, ATWRKY55	WRKY DNA-BINDING PROTEIN 55, WRKY DNA-binding protein 55
AT3G18400	106	289	0.366782	9742	27206	0.358083	0.399851	0.999983	anac058, NAC058	NAC domain containing protein 58
AT1G53170	58	289	0.200692	5268	27206	0.193634	0.403402	0.999983	ERF8, ATERF-8, ATERF8	ETHYLENE RESPONSE ELEMENT BINDING FACTOR 4, NA, ethylene response factor 8
AT3G10030	9	289	0.0311419	751	27206	0.0276042	0.404236	0.999983
AT3G20770	13	289	0.0449827	1118	27206	0.0410939	0.40945	0.999983	EIN3, AtEIN3	ETHYLENE-INSENSITIVE3, NA
AT1G51140	87	289	0.301038	7995	27206	0.293869	0.415907	0.999983	FBH3, AKS1	ABA-responsive kinase substrate 1, FLOWERING BHLH 3
AT2G15740	31	289	0.107266	2781	27206	0.10222	0.416254	0.999983
AT1G65910	69	289	0.238754	6318	27206	0.232228	0.418456	0.999983	NAC028, anac028	NAC domain containing protein 28
AT4G01540	92	289	0.318339	8476	27206	0.311549	0.422984	0.999983	NTM1, ANAC068	Arabidopsis NAC domain containing protein 68, NAC with transmembrane motif1
AT5G07310	23	289	0.0795848	2053	27206	0.0754613	0.426567	0.999983
AT2G46770	95	289	0.32872	8770	27206	0.322355	0.429933	0.999983	NST1, ANAC043	NAC SECONDARY WALL THICKENING PROMOTING FACTOR1, Arabidopsis NAC domain containing protein 43
AT2G18350	43	289	0.148789	3920	27206	0.144086	0.434944	0.999983	AtHB24, HB24, ZHD6	homeobox protein 24, ZINC FINGER HOMEODOMAIN 6
AT5G46590	91	289	0.314879	8406	27206	0.308976	0.435616	0.999983	anac096, NAC096	NAC domain containing protein 96
AT1G34670	34	289	0.117647	3086	27206	0.113431	0.437596	0.999983	MYB93, AtMYB93	myb domain protein 93
AT4G00250	99	289	0.342561	9162	27206	0.336764	0.438985	0.999983
AT3G01530	105	289	0.363322	9730	27206	0.357642	0.44179	0.999983	MYB57, ATMYB57	myb domain protein 57
AT1G20980	25	289	0.0865052	2263	27206	0.0831802	0.449239	0.999983	FBR6, SPL14, SPL1R2, ATSPL14	NA, squamosa promoter binding protein-like 14, SQUAMOSA PROMOTER BINDING PROTEIN-LIKE 14
AT5G50670	12	289	0.0415225	1061	27206	0.0389988	0.453787	0.999983	SPL13B, SPL13	SQUAMOSA PROMOTER-BINDING PROTEIN LIKE 13, SQUAMOSA PROMOTER-BINDING PROTEIN LIKE 13B
AT4G32730	79	289	0.273356	7322	27206	0.269132	0.457767	0.999983	MYB3R1, ATMYB3R-1, PC-MYB1, MYB3R-1, ATMYB3R1	C-MYB-LIKE TRANSCRIPTION FACTOR 3R-1, NA, A. thaliana MYB domain protein 3R1, MYB DOMAIN PROTEIN 3R1
AT2G30250	53	289	0.183391	4889	27206	0.179703	0.458932	0.999983	WRKY25, ATWRKY25	NA, WRKY DNA-binding protein 25
AT1G43700	16	289	0.0553633	1443	27206	0.0530398	0.466575	0.999983	SUE3, VIP1	VIRE2-interacting protein 1, sulphate utilization efficiency 3
AT3G60580	95	289	0.32872	8842	27206	0.325002	0.46824	0.999983
AT2G23340	30	289	0.103806	2758	27206	0.101375	0.473994	0.999983	DEAR3	DREB and EAR motif protein 3
AT5G11510	19	289	0.0657439	1732	27206	0.0636624	0.476374	0.999983	MYB3R-4, AtMYB3R4	myb domain protein 3r-4, myb domain protein 3R4
AT1G12260	88	289	0.304498	8200	27206	0.301404	0.476423	0.999983	VND4, EMB2749, ANAC007, NAC007	EMBRYO DEFECTIVE 2749, VASCULAR RELATED NAC-DOMAIN PROTEIN 4, NAC 007
AT4G28500	7	289	0.0242215	623	27206	0.0228994	0.493573	0.999983	NAC073, ANAC073, SND2	NAC domain containing protein 73, SECONDARY WALL-ASSOCIATED NAC DOMAIN PROTEIN 2
AT1G28470	151	289	0.522491	14171	27206	0.520878	0.501912	0.999983	ANAC010, NAC010, SND3	NAC domain containing protein 10, SECONDARY WALL-ASSOCIATED NAC DOMAIN PROTEIN 3
AT3G28920	61	289	0.211073	5711	27206	0.209917	0.504119	0.999983	HB34, AtHB34, ZHD9	ZINC FINGER HOMEODOMAIN 9, homeobox protein 34
AT5G62380	100	289	0.346021	9384	27206	0.344924	0.506566	0.999983	ANAC101, VND6, NAC101	NAC-domain protein 101, VASCULAR-RELATED NAC-DOMAIN 6
AT5G17800	13	289	0.0449827	1198	27206	0.0440344	0.508722	0.999983	MYB56, AtMYB56	myb domain protein 56
AT1G19000	103	289	0.356401	9687	27206	0.356061	0.517467	0.999983
AT1G76420	56	289	0.193772	5263	27206	0.19345	0.518326	0.999983	ANAC031, NAC368, CUC3	NA, Arabidopsis NAC domain containing protein 31, CUP SHAPED COTYLEDON3
AT5G61620	60	289	0.207612	5641	27206	0.207344	0.519014	0.999983
AT5G51190	28	289	0.0968858	2624	27206	0.0964493	0.519328	0.999983
AT5G03150	21	289	0.0726644	1965	27206	0.0722267	0.521282	0.999983	JKD	JACKDAW
AT1G44830	15	289	0.0519031	1398	27206	0.0513857	0.521735	0.999983
AT4G29230	40	289	0.138408	3776	27206	0.138793	0.533655	0.999983	NAC075, anac075	NAC domain containing protein 75
AT5G62000	98	289	0.3391	9252	27206	0.340072	0.536245	0.999983	ORE14, ARF1-BP, ARF2, HSS	HLS1 SUPPRESSOR, ORESARA 14, ARF1-BINDING PROTEIN, auxin response factor 2
AT5G53950	33	289	0.114187	3118	27206	0.114607	0.53671	0.999983	ATCUC2, ANAC098, CUC2	CUP-SHAPED COTYLEDON 2, Arabidopsis NAC domain containing protein 98
AT1G46768	20	289	0.0692042	1889	27206	0.0694332	0.53952	0.999983	RAP2.1	related to AP2 1
AT5G23280	9	289	0.0311419	842	27206	0.0309491	0.539612	0.999983
AT3G18990	55	289	0.190311	5211	27206	0.191539	0.545168	0.999983	REM39, VRN1	REDUCED VERNALIZATION RESPONSE 1, REPRODUCTIVE MERISTEM 39
AT3G01970	82	289	0.283737	7776	27206	0.285819	0.553769	0.999983	ATWRKY45, WRKY45	WRKY DNA-binding protein 45, WRKY DNA-BINDING PROTEIN 45
AT5G56840	72	289	0.249135	6836	27206	0.251268	0.556197	0.999983
AT5G47220	7	289	0.0242215	663	27206	0.0243696	0.559373	0.999983	ERF2, ATERF-2, ATERF2	ethylene responsive element binding factor 2, ETHYLENE RESPONSIVE ELEMENT BINDING FACTOR 2, ETHYLENE RESPONSE FACTOR- 2
AT5G07680	27	289	0.0934256	2581	27206	0.0948688	0.563169	0.999983	ANAC079, NAC080, ANAC080, NAC4, ATNAC4	Arabidopsis NAC domain containing protein 79, NA, NAC domain containing protein 80
AT1G76880	5	289	0.017301	472	27206	0.0173491	0.564435	0.999983
AT1G75080	10	289	0.0346021	960	27206	0.0352863	0.56997	0.999983	BZR1	BRASSINAZOLE-RESISTANT 1
AT4G31800	137	289	0.474048	12996	27206	0.477689	0.57255	0.999983	ATWRKY18, WRKY18	ARABIDOPSIS THALIANA WRKY DNA-BINDING PROTEIN 18, WRKY DNA-binding protein 18
AT3G50060	174	289	0.602076	16474	27206	0.605528	0.573465	0.999983	MYB77	myb domain protein 77
AT2G43000	52	289	0.179931	4985	27206	0.183232	0.58203	0.999983	JUB1, NAC042, ANAC042	NAC domain containing protein 42, JUNGBRUNNEN 1
AT4G18170	101	289	0.349481	9623	27206	0.353709	0.582097	0.999983	WRKY28, ATWRKY28	NA, WRKY DNA-binding protein 28
AT1G51220	33	289	0.114187	3183	27206	0.116996	0.586854	0.999983	AtWIP5, WIP5	NA, WIP domain protein 5
AT3G26620	14	289	0.0484429	1361	27206	0.0500257	0.587761	0.999983	LBD23	LOB domain-containing protein 23
AT1G34180	115	289	0.397924	10965	27206	0.403036	0.592795	0.999983	anac016, NAC016	NAC domain containing protein 16
AT1G29860	75	289	0.259516	7206	27206	0.264868	0.604378	0.999983	ATWRKY71, WRKY71	WRKY DNA-BINDING PROTEIN 71, WRKY DNA-binding protein 71
AT3G55370	114	289	0.394464	10921	27206	0.401419	0.61761	0.999983	OBP3	OBF-binding protein 3
AT3G02940	67	289	0.231834	6493	27206	0.238661	0.630243	0.999983	AtMYB107, MYB107	myb domain protein 107
AT2G26960	29	289	0.100346	2864	27206	0.105271	0.636393	0.999983	AtMYB81, MYB81	myb domain protein 81
AT3G03200	92	289	0.318339	8906	27206	0.327354	0.649968	0.999983	anac045, NAC045	NAC domain containing protein 45
AT4G23550	24	289	0.083045	2397	27206	0.0881056	0.650127	0.999983	WRKY29, ATWRKY29	NA
AT1G63030	3	289	0.0103806	314	27206	0.0115416	0.650598	0.999983	ddf2	DWARF AND DELAYED FLOWERING 2
AT1G13450	4	289	0.0138408	418	27206	0.0153643	0.650764	0.999983	GT-1	GT-1
AT2G42200	144	289	0.49827	13831	27206	0.508381	0.657251	0.999983	SPL9, AtSPL9	NA, squamosa promoter binding protein-like 9
AT4G26640	20	289	0.0692042	2017	27206	0.0741381	0.658631	0.999983	AtWRKY20, WRKY20	NA
AT4G21030	7	289	0.0242215	731	27206	0.0268691	0.661434	0.999983	ATDOF4.2, ATDOF4;2	NA
AT3G61150	85	289	0.294118	8282	27206	0.304418	0.670081	0.999983	HDG1, HD-GL2-1	homeodomain GLABROUS 1, HOMEODOMAIN-GLABRA2 1
AT3G23220	13	289	0.0449827	1346	27206	0.0494744	0.676899	0.999983	ESE1	ethylene and salt inducible 1
AT1G19040	9	289	0.0311419	948	27206	0.0348453	0.680346	0.999983
AT2G42430	5	289	0.017301	540	27206	0.0198486	0.681969	0.999983	LBD16, ASL18	lateral organ boundaries-domain 16, ASYMMETRIC LEAVES2-LIKE 18
AT4G15090	7	289	0.0242215	748	27206	0.0274939	0.684599	0.999983	FAR1	FAR-RED IMPAIRED RESPONSE 1
AT5G66300	29	289	0.100346	2931	27206	0.107734	0.685814	0.999983	NAC105, ANAC105, VND3	NAC domain containing protein 105, VASCULAR-RELATED NAC-DOMAIN 3, Arabidopsis NAC domain containing protein 105
AT2G32460	6	289	0.0207612	651	27206	0.0239285	0.692719	0.999983	ATM1, ATMYB101, MYB101	NA, myb domain protein 101, ARABIDOPSIS THALIANA MYB 1
AT3G52440	54	289	0.186851	5369	27206	0.197346	0.69643	0.999983
AT5G41570	61	289	0.211073	6051	27206	0.222414	0.701207	0.999983	WRKY24, ATWRKY24	ARABIDOPSIS THALIANA WRKY DNA-BINDING PROTEIN 24, WRKY DNA-binding protein 24
AT3G42860	21	289	0.0726644	2167	27206	0.0796515	0.70158	0.999983
AT3G47500	64	289	0.221453	6342	27206	0.23311	0.702763	0.999983	CDF3	cycling DOF factor 3
AT3G11440	25	289	0.0865052	2565	27206	0.0942807	0.704397	0.999983	MYB65, ATMYB65	MYB DOMAIN PROTEIN 65, myb domain protein 65
AT4G37180	102	289	0.352941	9979	27206	0.366794	0.70843	0.999983
AT1G50640	26	289	0.0899654	2671	27206	0.0981769	0.709917	0.999983	ATERF3, ERF3	ethylene responsive element binding factor 3, NA
AT5G08750	8	289	0.0276817	872	27206	0.0320518	0.71138	0.999983
AT1G01720	77	289	0.266436	7615	27206	0.279901	0.716354	0.999983	ANAC002, ATAF1	NA, Arabidopsis NAC domain containing protein 2
AT3G04060	44	289	0.152249	4439	27206	0.163163	0.716686	0.999983	NAC046, anac046	NAC domain containing protein 46
AT5G05790	32	289	0.110727	3277	27206	0.120451	0.721357	0.999983
AT5G13180	90	289	0.311419	8891	27206	0.326803	0.732086	0.999983	ANAC083, NAC083, VNI2	VND-interacting 2, NAC domain containing protein 83
AT5G06100	145	289	0.50173	14118	27206	0.51893	0.741455	0.999983	ATMYB33, MYB33	NA, myb domain protein 33
AT3G46590	3	289	0.0103806	363	27206	0.0133426	0.743544	0.999983	TRFL1, ATTRP2, TRP2	NA, TRF-like 1
AT1G31140	117	289	0.404844	11483	27206	0.422076	0.743549	0.999983	GOA, AGL63	AGAMOUS-like 63, GORDITA
AT1G55110	41	289	0.141869	4200	27206	0.154378	0.746443	0.999983	IDD7, AtIDD7	indeterminate(ID)-domain 7
AT4G38000	49	289	0.16955	4985	27206	0.183232	0.749295	0.999983	DOF4.7	DNA binding with one finger 4.7
AT3G27010	8	289	0.0276817	908	27206	0.033375	0.752007	0.999983	TCP20, PCF1, ATTCP20, AT-TCP20	TEOSINTE BRANCHED 1, cycloidea, PCF (TCP)-domain family protein 20, NA, ARABIDOPSIS THALIANA TEOSINTE BRANCHED 1, CYCLOIDEA, PCF (TCP)-DOMAIN FAMILY PROTEIN 20
AT5G66730	17	289	0.0588235	1834	27206	0.0674116	0.753752	0.999983	ENY, IDD1	ENHYDROUS, INDETERMINATE DOMAIN 1
AT5G47230	6	289	0.0207612	700	27206	0.0257296	0.756465	0.999983	ERF5, ERF102, AtMACD1, ATERF5, ATERF-5	ETHYLENE RESPONSIVE ELEMENT BINDING FACTOR 5, NA, ETHYLENE RESPONSIVE ELEMENT BINDING FACTOR- 5, ethylene responsive element binding factor 5
AT2G47070	36	289	0.124567	3731	27206	0.137139	0.758155	0.999983	SPL1	squamosa promoter binding protein-like 1
AT4G01500	19	289	0.0657439	2043	27206	0.0750937	0.759095	0.999983	NGA4	NGATHA4
AT2G01940	19	289	0.0657439	2043	27206	0.0750937	0.759095	0.999983	ATIDD15, SGR5	ARABIDOPSIS THALIANA INDETERMINATE(ID)-DOMAIN 15, SHOOT GRAVITROPISM 5
AT1G79580	116	289	0.401384	11441	27206	0.420532	0.764627	0.999983	ANAC033, URP7, SMB	Arabidopsis NAC domain containing protein 33, UAS-TAGGED ROOT PATTERNING7, SOMBRERO
AT3G26790	23	289	0.0795848	2463	27206	0.0905315	0.771332	0.999983	FUS3	FUSCA 3
AT2G22540	80	289	0.276817	8029	27206	0.295119	0.772403	0.999983	AGL22, FAQ1, SVP	SHORT VEGETATIVE PHASE, AGAMOUS-like 22, Flowering Arabidopsis QTL1
AT2G40260	44	289	0.152249	4565	27206	0.167794	0.783376	0.999983
AT1G35460	48	289	0.16609	4976	27206	0.182901	0.79233	0.999983	FBH1	FLOWERING BHLH 1
AT1G74480	8	289	0.0276817	949	27206	0.034882	0.793215	0.999983	URP4, AtRKD2, RKD2	NA, UAS-TAGGED ROOT PATTERNING4, RWP-RK domain containing 2
AT2G37590	124	289	0.429066	12278	27206	0.451298	0.794545	0.999983	DOF2.4, ATDOF2.4	NA, DNA binding with one finger 2.4
AT5G45580	120	289	0.415225	11902	27206	0.437477	0.795428	0.999983
AT3G04070	63	289	0.217993	6448	27206	0.237007	0.796746	0.999983	anac047, NAC047	NAC domain containing protein 47
AT3G15270	41	289	0.141869	4301	27206	0.15809	0.798363	0.999983	SPL5	squamosa promoter binding protein-like 5
AT1G22810	26	289	0.0899654	2811	27206	0.103323	0.79964	0.999983
AT3G10500	43	289	0.148789	4516	27206	0.165993	0.806655	0.999983	NTL4, NAC053, ANAC053	NAC domain containing protein 53, NAC with transmembrane motif 1-like 4
AT1G19850	171	289	0.591696	16725	27206	0.614754	0.808295	0.999983	IAA24, ARF5, MP	MONOPTEROS, indole-3-acetic acid inducible 24, AUXIN RESPONSE FACTOR 5
AT5G63090	10	289	0.0346021	1184	27206	0.0435198	0.811775	0.999983	LOB	LATERAL ORGAN BOUNDARIES
AT1G30650	37	289	0.128028	3937	27206	0.144711	0.813501	0.999983	AR411, WRKY14, ATWRKY14	NA, WRKY DNA-BINDING PROTEIN 14, WRKY DNA-binding protein 14
AT1G36060	5	289	0.017301	641	27206	0.023561	0.813647	0.999983
AT5G04390	73	289	0.252595	7462	27206	0.274278	0.814607	0.999983
AT3G45610	120	289	0.415225	11966	27206	0.439829	0.817612	0.999983	DOF6	DOF transcription factor 6
AT2G38340	32	289	0.110727	3451	27206	0.126847	0.819548	0.999983	DREB19	dehydration response element-binding protein 19
AT5G13790	18	289	0.0622837	2032	27206	0.0746894	0.819905	0.999983	AGL15	AGAMOUS-like 15
AT4G18450	4	289	0.0138408	537	27206	0.0197383	0.824651	0.999983
AT5G65130	15	289	0.0519031	1742	27206	0.06403	0.833145	0.999983
AT1G29280	70	289	0.242215	7252	27206	0.266559	0.843317	0.999983	WRKY65, ATWRKY65	WRKY DNA-BINDING PROTEIN 65, WRKY DNA-binding protein 65
AT1G69570	61	289	0.211073	6388	27206	0.234801	0.847888	0.999983
AT5G66700	74	289	0.256055	7658	27206	0.281482	0.849158	0.999983	ATHB53, HB53, HB-8	ARABIDOPSIS THALIANA HOMEOBOX 53, homeobox 53, HOMEOBOX-8
AT3G22830	167	289	0.577855	16479	27206	0.605712	0.84955	0.999983	HSFA6B, AT-HSFA6B	ARABIDOPSIS THALIANA HEAT SHOCK TRANSCRIPTION FACTOR A6B, heat shock transcription factor A6B
AT4G24240	15	289	0.0519031	1772	27206	0.0651327	0.850998	0.999983	WRKY7, ATWRKY7	WRKY DNA-binding protein 7, NA
AT2G45680	2	289	0.00692042	317	27206	0.0116518	0.852477	0.999983	TCP9	TCP domain protein 9
AT5G03790	115	289	0.397924	11605	27206	0.42656	0.853073	0.999983	LMI1, HB51, ATHB51	NA, LATE MERISTEM IDENTITY1, homeobox 51
AT3G56400	64	289	0.221453	6714	27206	0.246784	0.858753	0.999983	WRKY70, ATWRKY70	WRKY DNA-binding protein 70, ARABIDOPSIS THALIANA WRKY DNA-BINDING PROTEIN 70
AT1G74840	73	289	0.252595	7603	27206	0.27946	0.862393	0.999983
AT1G75240	121	289	0.418685	12208	27206	0.448725	0.862617	0.999983	AtHB33, ZHD5, HB33	zinc-finger homeodomain 5, homeobox protein 33
AT3G22760	52	289	0.179931	5548	27206	0.203926	0.863114	0.999983	SOL1	NA
AT2G24430	49	289	0.16955	5259	27206	0.193303	0.865798	0.999983	ANAC039, ANAC038, NAC038	Arabidopsis NAC domain containing protein 39, NAC domain containing protein 38
AT5G02320	20	289	0.0692042	2334	27206	0.0857899	0.870135	0.999983	MYB3R-5, ATMYB3R5	ARABIDOPSIS THALIANA MYB DOMAIN PROTEIN 3R5, myb domain protein 3r-5
AT3G24050	7	289	0.0242215	934	27206	0.0343307	0.870603	0.999983	GATA1	GATA transcription factor 1
AT5G39820	5	289	0.017301	705	27206	0.0259134	0.871818	0.999983	NAC094, anac094	NAC domain containing protein 94
AT1G47655	7	289	0.0242215	944	27206	0.0346982	0.877323	0.999983
AT4G36620	1	289	0.00346021	199	27206	0.00731456	0.881522	0.999983	GATA19, HANL2	GATA transcription factor 19, hanaba taranu like 2
AT5G13080	132	289	0.456747	13330	27206	0.489965	0.883986	0.999983	WRKY75, ATWRKY75	WRKY DNA-binding protein 75, ARABIDOPSIS THALIANA WRKY DNA-BINDING PROTEIN 75
AT5G52830	21	289	0.0726644	2483	27206	0.0912666	0.889132	0.999983	ATWRKY27, WRKY27	ARABIDOPSIS THALIANA WRKY DNA-BINDING PROTEIN 27, WRKY DNA-binding protein 27
AT4G17980	106	289	0.366782	10890	27206	0.400279	0.890852	0.999983	anac071, NAC071	NAC domain containing protein 71
AT5G46350	139	289	0.480969	14021	27206	0.515364	0.89164	0.999983	WRKY8, ATWRKY8	ARABIDOPSIS THALIANA WRKY DNA-BINDING PROTEIN 8, WRKY DNA-binding protein 8
AT1G49480	111	289	0.384083	11379	27206	0.418253	0.893593	0.999983	RTV1	related to vernalization1 1
AT4G14770	48	289	0.16609	5249	27206	0.192935	0.893743	0.999983	TCX2, ATTCX2	TESMIN/TSO1-LIKE CXC 2, TESMIN/TSO1-like CXC 2
AT1G14687	119	289	0.411765	12176	27206	0.447548	0.901652	0.999983	HB32, ZHD14, AtHB32	ZINC FINGER HOMEODOMAIN 14, homeobox protein 32
AT1G52150	49	289	0.16955	5388	27206	0.198045	0.904454	0.999983	ATHB15, CNA, ATHB-15, ICU4	NA, CORONA, INCURVATA 4
AT2G01930	9	289	0.0311419	1229	27206	0.0451739	0.909078	0.999983	BPC1, ATBPC1, BBR	BASIC PENTACYSTEINE1, NA, basic pentacysteine1
AT5G10510	3	289	0.0103806	511	27206	0.0187826	0.910337	0.999983	AIL6, PLT3	AINTEGUMENTA-like 6, PLETHORA 3
AT1G49560	65	289	0.224913	7001	27206	0.257333	0.910581	0.999983
AT1G69180	69	289	0.238754	7396	27206	0.271852	0.910927	0.999983	CRC	CRABS CLAW
AT2G46590	102	289	0.352941	10600	27206	0.38962	0.911502	0.999983	DAG2	DOF AFFECTING GERMINATION 2
AT5G66940	141	289	0.487889	14312	27206	0.52606	0.913909	0.999983
AT3G60530	10	289	0.0346021	1361	27206	0.0500257	0.917194	0.999983	GATA4	GATA transcription factor 4
AT3G14180	44	289	0.152249	4937	27206	0.181467	0.917477	0.999983	ASIL2	Arabidopsis 6B-interacting protein 1-like 2
AT3G21890	108	289	0.373702	11208	27206	0.411968	0.91811	0.999983	BBX31	B-box domain protein 31
AT4G00730	51	289	0.176471	5649	27206	0.207638	0.919315	0.999983	AHDP, ANL2	ARABIDOPSIS THALIANA HOMEODOMAIN PROTEIN, ANTHOCYANINLESS 2
AT2G46680	79	289	0.273356	8422	27206	0.309564	0.920871	0.999983	ATHB7, ATHB-7, HB-7	homeobox 7, ARABIDOPSIS THALIANA HOMEOBOX 7
AT4G01280	61	289	0.211073	6654	27206	0.244578	0.92121	0.999983
AT5G05550	69	289	0.238754	7445	27206	0.273653	0.921415	0.999983
AT1G27730	131	289	0.453287	13417	27206	0.493163	0.922632	0.999983	ZAT10, STZ	NA, salt tolerance zinc finger
AT2G03500	92	289	0.318339	9700	27206	0.356539	0.92384	0.999983
AT1G29160	82	289	0.283737	8733	27206	0.320995	0.924465	0.999983
AT2G28810	144	289	0.49827	14654	27206	0.538631	0.925336	0.999983
AT1G01250	4	289	0.0138408	667	27206	0.0245167	0.926127	0.999983
AT5G63260	101	289	0.349481	10611	27206	0.390024	0.931507	0.999983
AT2G18550	55	289	0.190311	6124	27206	0.225097	0.934702	0.999983	HB21, ATHB21, HB-2	homeobox-2, homeobox protein 21
AT1G08010	22	289	0.0761246	2746	27206	0.100934	0.938715	0.999983	GATA11	GATA transcription factor 11
AT1G25550	78	289	0.269896	8432	27206	0.309932	0.940101	0.999983
AT2G23320	144	289	0.49827	14748	27206	0.542086	0.940704	0.999983	AtWRKY15, WRKY15	NA, WRKY DNA-binding protein 15
AT5G60130	124	289	0.429066	12890	27206	0.473793	0.944356	0.999983
AT1G64620	90	289	0.311419	9660	27206	0.355069	0.948596	0.999983
AT5G47370	69	289	0.238754	7602	27206	0.279424	0.948645	0.999983	HAT2	NA
AT5G14960	6	289	0.0207612	979	27206	0.0359847	0.950455	0.999983	E2FD, E2L1, DEL2	DP-E2F-like 2, NA
AT4G36740	143	289	0.49481	14742	27206	0.541866	0.952682	0.999983	ATHB40, HB40, HB-5	NA, homeobox protein 40
AT1G70920	9	289	0.0311419	1360	27206	0.049989	0.955151	0.999983	ATHB18, HB18	homeobox-leucine zipper protein 18
AT1G76890	62	289	0.214533	6961	27206	0.255863	0.956256	0.999983	GT2, AT-GT2	NA
AT2G20110	37	289	0.128028	4428	27206	0.162758	0.957771	0.999983
AT3G04030	112	289	0.387543	11856	27206	0.435786	0.958043	0.999983	MYR2	NA
AT5G52660	26	289	0.0899654	3280	27206	0.120562	0.959623	0.999983
AT1G13260	85	289	0.294118	9274	27206	0.340881	0.961086	0.999983	EDF4, RAV1	ETHYLENE RESPONSE DNA BINDING FACTOR 4, related to ABI3/VP1 1
AT1G68670	66	289	0.228374	7410	27206	0.272366	0.962322	0.999983
AT5G18450	15	289	0.0519031	2095	27206	0.0770051	0.963605	0.999983
AT5G47390	113	289	0.391003	12035	27206	0.442366	0.966638	0.999983	MYBH	MYB hypocotyl elongation-related
AT5G39760	142	289	0.491349	14781	27206	0.543299	0.967046	0.999983	AtHB23, ZHD10, HB23	ZINC FINGER HOMEODOMAIN 10, homeobox protein 23
AT1G51700	84	289	0.290657	9240	27206	0.339631	0.967633	0.999983	ADOF1, DOF1	DOF zinc finger protein 1
AT2G22430	71	289	0.245675	7960	27206	0.292583	0.967858	0.999983	HB6, ATHB6	homeobox protein 6
AT5G67580	46	289	0.15917	5446	27206	0.200176	0.968819	0.999983	TBP3, ATTRB2, ATTBP3, TRB2	TELOMERE REPEAT BINDING FACTOR 2, NA, TELOMERE-BINDING PROTEIN 3
AT5G13910	2	289	0.00692042	501	27206	0.0184151	0.970742	0.999983	LEP	LEAFY PETIOLE
AT3G50410	141	289	0.487889	14784	27206	0.54341	0.975069	0.999983	OBP1	OBF binding protein 1
AT2G27300	40	289	0.138408	4907	27206	0.180365	0.97687	0.999983	NTL8, ANAC040	NTM1-like 8, Arabidopsis NAC domain containing protein 40
AT4G01250	141	289	0.487889	14815	27206	0.544549	0.97727	0.999983	WRKY22, AtWRKY22	NA
AT5G01380	7	289	0.0242215	1235	27206	0.0453944	0.978629	0.999983
AT5G65510	3	289	0.0103806	698	27206	0.0256561	0.979972	0.999983	PLT7, AIL7	AINTEGUMENTA-like 7, PLETHORA 7
AT2G06200	43	289	0.148789	5295	27206	0.194626	0.982507	0.999983	GRF6, AtGRF6	growth-regulating factor 6
AT5G65410	129	289	0.446367	13783	27206	0.506616	0.982996	0.999983	ATHB25, ZFHD2, ZHD1, HB25	homeobox protein 25, ZINC FINGER HOMEODOMAIN 1, ZINC FINGER HOMEODOMAIN 2, ARABIDOPSIS THALIANA HOMEOBOX PROTEIN 25
AT5G59430	2	289	0.00692042	563	27206	0.020694	0.983517	0.999983	TRP1, ATTRP1	telomeric repeat binding protein 1, TELOMERE REPEAT BINDING PROTEIN 1
AT5G62940	158	289	0.546713	16515	27206	0.607035	0.984547	0.999983	DOF5.6, HCA2	HIGH CAMBIAL ACTIVITY2, DNA BINDING WITH ONE FINGER 5.6
AT5G60850	94	289	0.32526	10467	27206	0.384731	0.984971	0.999983	OBP4	OBF binding protein 4
AT2G45410	57	289	0.197232	6835	27206	0.251231	0.987599	0.999983	LBD19	LOB domain-containing protein 19
AT1G30490	62	289	0.214533	7375	27206	0.27108	0.988885	0.999983	PHV, ATHB9	PHAVOLUTA, NA
AT1G49010	124	289	0.429066	13448	27206	0.494303	0.989074	0.999983
AT1G69780	124	289	0.429066	13486	27206	0.495699	0.990374	0.999983	ATHB13	NA
AT1G33240	75	289	0.259516	8782	27206	0.322796	0.992149	0.999983	ATGTL1, GTL1, AT-GTL1	NA, GT2-LIKE 1, GT-2-like 1
AT4G21080	136	289	0.470588	14693	27206	0.540065	0.992607	0.999983	AtDOF4.5, DOF4.5	DNA-binding with One Finger 4.5, NA
AT5G02840	30	289	0.103806	4110	27206	0.15107	0.992632	0.999983	LCL1	LHY/CCA1-like 1
AT4G38170	21	289	0.0726644	3161	27206	0.116188	0.994646	0.999983	FRS9	FAR1-related sequence 9
AT1G20910	52	289	0.179931	6556	27206	0.240976	0.995072	0.999983
AT5G02460	158	289	0.546713	16899	27206	0.62115	0.996081	0.999983
AT5G26170	87	289	0.301038	10181	27206	0.374219	0.99634	0.999983	ATWRKY50, WRKY50	ARABIDOPSIS THALIANA WRKY DNA-BINDING PROTEIN 50, WRKY DNA-binding protein 50
AT1G01060	104	289	0.359862	11896	27206	0.437256	0.996997	0.999983	LHY, LHY1	LATE ELONGATED HYPOCOTYL, LATE ELONGATED HYPOCOTYL 1
AT3G09600	67	289	0.231834	8276	27206	0.304198	0.99757	0.999983	LCL5, RVE8	LHY-CCA1-LIKE5, REVEILLE 8
AT3G24120	181	289	0.626298	19124	27206	0.702933	0.997983	0.999983
AT5G17300	137	289	0.474048	15403	27206	0.566162	0.999361	0.999983	RVE1	REVEILLE 1
AT1G72740	16	289	0.0553633	2924	27206	0.107476	0.999372	0.999983
AT1G18330	153	289	0.529412	16878	27206	0.620378	0.999377	0.999983	RVE7, EPR1	EARLY-PHYTOCHROME-RESPONSIVE1, REVEILLE 7
AT5G65310	120	289	0.415225	14295	27206	0.525436	0.999937	0.999983	ATHB-5, HB5, ATHB5	NA, homeobox protein 5
AT3G10113	132	289	0.456747	15664	27206	0.575755	0.999983	0.999983
a The number of genes bound by the specific TF in the test set.
b The number of genes in the test set.
c The number of genes bound by the specific TF in the reference set.
d The number of genes in the reference set.
e The p-value after Bonferroni or Benjamini-Hochberg correction.
